# Supplementary material for: Impact of LTR-Retrotransposons on Genome Structure, Evolution, and Function in Curcurbitaceae Species
Source: MDPI journal article supplement (doi:10.3390/ijms231710158), 2022-09-05
Supplement: s1 [file s1]

Table S1 Detection and characteristics of full-length LTR-RTs in Cucurbitaceae species

| Species                        | Assembled genome size | Number of full-length LTR-RTs | Cumulative length | Number/Mb | Number of each type |              |         | Average length of each type (bp) |              |         |
|--------------------------------|-----------------------|-------------------------------|-------------------|-----------|---------------------|--------------|---------|----------------------------------|--------------|---------|
|                                |                       |                               |                   |           | <i>Copia</i>        | <i>Gypsy</i> | Unknown | <i>Copia</i>                     | <i>Gypsy</i> | Unknown |
| <i>Cucumis hystrix</i>         | 289                   | 625                           | 3,275,727         | 2.2       | 211                 | 365          | 49      | 5520                             | 5357         | 3175    |
| <i>Cucumis sativus</i>         | 226.2                 | 450                           | 2,645,514         | 2.0       | 164                 | 215          | 71      | 6104                             | 6754         | 2625    |
| <i>Cucumis melo</i>            | 417                   | 269                           | 1,494,679         | 0.6       | 108                 | 148          | 13      | 6052                             | 5436         | 2818    |
| <i>Cucumis metuliferus</i>     | 316.8                 | 522                           | 3,810,409         | 1.6       | 261                 | 233          | 28      | 5774                             | 9225         | 5500    |
| <i>Benincasa hispida</i>       | 913                   | 914                           | 6,101,374         | 1.0       | 514                 | 319          | 81      | 5958                             | 8289         | 4861    |
| <i>Citrullus lanatus</i>       | 396.4                 | 349                           | 2,788,382         | 0.9       | 118                 | 172          | 59      | 6272                             | 9092         | 8211    |
| <i>Lagenaria siceraria</i>     | 313.4                 | 646                           | 3,682,561         | 2.1       | 321                 | 221          | 104     | 5749                             | 6578         | 3689    |
| <i>Cucurbita argyrosperma</i>  | 255.2                 | 528                           | 2,523,365         | 2.1       | 289                 | 157          | 82      | 4631                             | 5776         | 3393    |
| <i>Cucurbita moschata</i>      | 269.9                 | 605                           | 2,786,293         | 2.2       | 358                 | 116          | 131     | 4876                             | 6167         | 2484    |
| <i>Cucurbita pepo</i>          | 261.4                 | 339                           | 1,530,852         | 1.3       | 224                 | 49           | 66      | 4928                             | 5507         | 2380    |
| <i>Cucurbita maxima</i>        | 271.4                 | 472                           | 2,300,796         | 1.7       | 333                 | 49           | 90      | 5235                             | 6498         | 2657    |
| <i>Sechium edule</i>           | 606.4                 | 3567                          | 23,790,490        | 5.9       | 1069                | 1723         | 775     | 5531                             | 7310         | 6800    |
| <i>Trichosanthes anguina</i>   | 919.8                 | 7833                          | 63,807,282        | 8.5       | 3763                | 2877         | 1193    | 8579                             | 8640         | 5590    |
| <i>Momordica charantia</i>     | 285.6                 | 242                           | 1,230,197         | 0.8       | 136                 | 74           | 32      | 4760                             | 6117         | 4070    |
| <i>Siraitia grosvenorii</i>    | 467.1                 | 1836                          | 10,585,418        | 3.9       | 976                 | 654          | 206     | 5505                             | 6745         | 3890    |
| <i>Gynostemma pentaphyllum</i> | 582.9                 | 4739                          | 34,541,089        | 8.1       | 1812                | 1908         | 1019    | 5597                             | 9505         | 6141    |

Table S2 Detailed information of the genomes of 16 Cucurbitaceae species and 1 related Begoniaceae species

| Species                       | Genus            | Tribe       | Family        | Estimated genome size (Mb) | Assembled genome size (Mb) | Genome download linkage                                                                                                                                                           |
|-------------------------------|------------------|-------------|---------------|----------------------------|----------------------------|-----------------------------------------------------------------------------------------------------------------------------------------------------------------------------------|
| <i>Cucumis hystrix</i>        | <i>Cucumis</i>   | Benincaseae | Cucurbitaceae | 416.0                      | 289.0                      | <a href="https://figshare.com/articles/dataset/Genome_assembly_of_Cucumis_hystrix/13377671">https://figshare.com/articles/dataset/Genome_assembly_of_Cucumis_hystrix/13377671</a> |
| <i>Cucumis sativus</i>        | <i>Cucumis</i>   | Benincaseae | Cucurbitaceae | 350.0                      | 226.6                      | <a href="https://www.ncbi.nlm.nih.gov/genome/1639?genome_assembly_id=749658">https://www.ncbi.nlm.nih.gov/genome/1639?genome_assembly_id=749658</a>                               |
| <i>Cucumis melo</i>           | <i>Cucumis</i>   | Benincaseae | Cucurbitaceae | 450.0                      | 417.0                      | <a href="ftp://cucurbitgenomics.org/pub/cucurbit/genome/melon/v3.6.1/">ftp://cucurbitgenomics.org/pub/cucurbit/genome/melon/v3.6.1/</a>                                           |
| <i>Cucumis metuliferus</i>    | <i>Cucumis</i>   | Benincaseae | Cucurbitaceae | 368.0                      | 316.8                      | <a href="https://ngdc.cncb.ac.cn/gwh/Assembly/10134/show">https://ngdc.cncb.ac.cn/gwh/Assembly/10134/show</a>                                                                     |
| <i>Benincasa hispida</i>      | <i>Benincasa</i> | Benincaseae | Cucurbitaceae | 1030.0                     | 913.0                      | <a href="https://www.ncbi.nlm.nih.gov/genome/18245?genome_assembly_id=747481">https://www.ncbi.nlm.nih.gov/genome/18245?genome_assembly_id=747481</a>                             |
| <i>Citrullus lanatus</i>      | <i>Citrullus</i> | Benincaseae | Cucurbitaceae | 419.2                      | 396.4                      | <a href="ftp://cucurbitgenomics.org/pub/cucurbit/genome/watermelon/WCG/">ftp://cucurbitgenomics.org/pub/cucurbit/genome/watermelon/WCG/</a>                                       |
| <i>Lagenaria siceraria</i>    | <i>Lagenaria</i> | Benincaseae | Cucurbitaceae | 334.0                      | 313.4                      | <a href="http://cucurbitgenomics.org/organism/13">http://cucurbitgenomics.org/organism/13</a>                                                                                     |
| <i>Cucurbita argyrosperma</i> | <i>Cucurbita</i> | Cucurbiteae | Cucurbitaceae | 238.0                      | 255.2                      | <a href="https://www.ncbi.nlm.nih.gov/genome/75408?genome_assembly_id=1634948">https://www.ncbi.nlm.nih.gov/genome/75408?genome_assembly_id=1634948</a>                           |
| <i>Cucurbita moschata</i>     | <i>Cucurbita</i> | Cucurbiteae | Cucurbitaceae | 372.0                      | 269.9                      | <a href="https://www.ncbi.nlm.nih.gov/genome/18321?genome_assembly_id=351850">https://www.ncbi.nlm.nih.gov/genome/18321?genome_assembly_id=351850</a>                             |
| <i>Cucurbita pepo</i>         | <i>Cucurbita</i> | Cucurbiteae | Cucurbitaceae | 283.0                      | 261.4                      | <a href="https://www.ncbi.nlm.nih.gov/genome/12199?genome_assembly_id=380250">https://www.ncbi.nlm.nih.gov/genome/12199?genome_assembly_id=380250</a>                             |

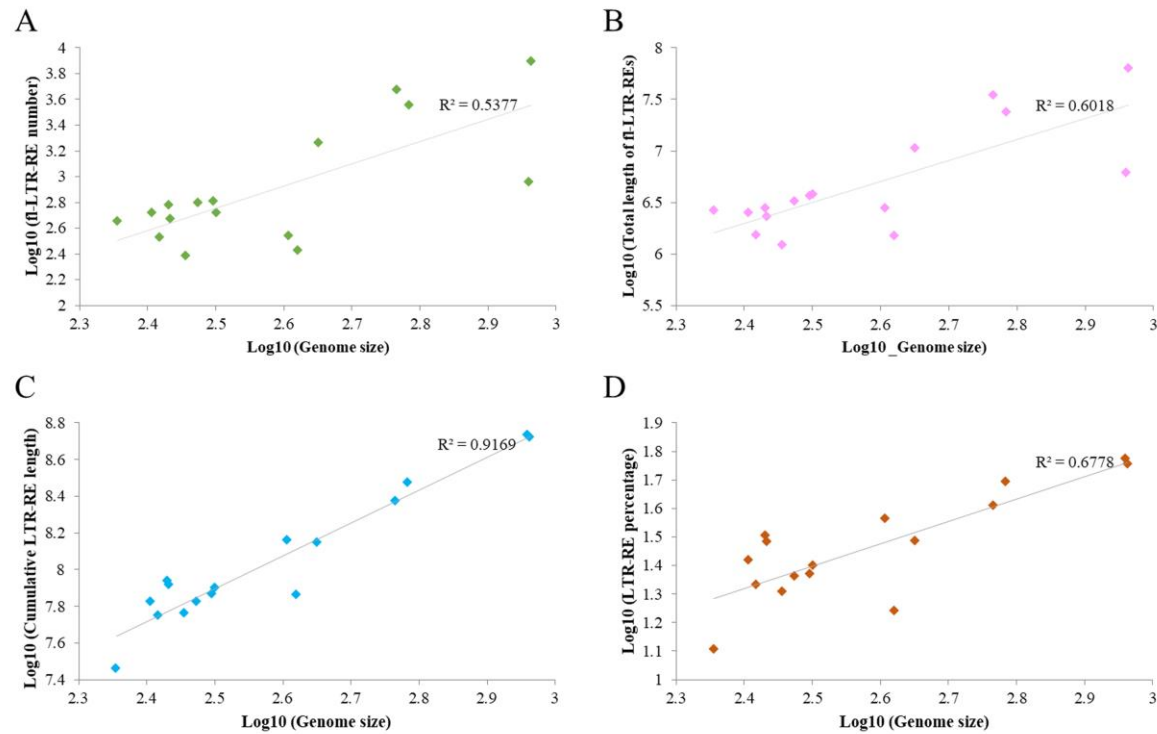

**Figure S1.** Correlation between genome size and full-length LTR-RT fraction or LTR-RT fractions in Cucurbitaceae species. (A) Genome size versus number of full-length LTR-RTs; (B) genome size versus cumulative length of full-length LTR-RTs; (C) genome size versus the total length of LTR-RTs including full-length and fractionated elements; (D) genome size versus the percentage of genomes occupied by LTR-RTs including full-length and fractionated elements.

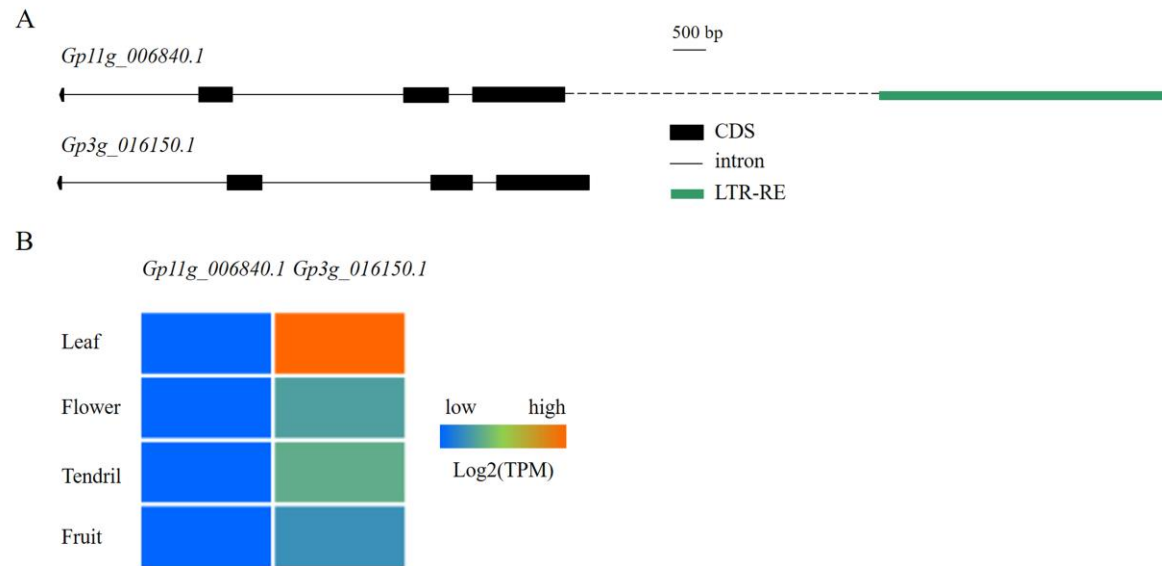

**Figure S2.** Example of gene with promoter LTR-RT insertion showed lower expression level than its paralog. **(A)** Gene structure of a paralogous gene pair with or without LTR-RT insertion; **(B)** Expression level of this paralogous gene pair.

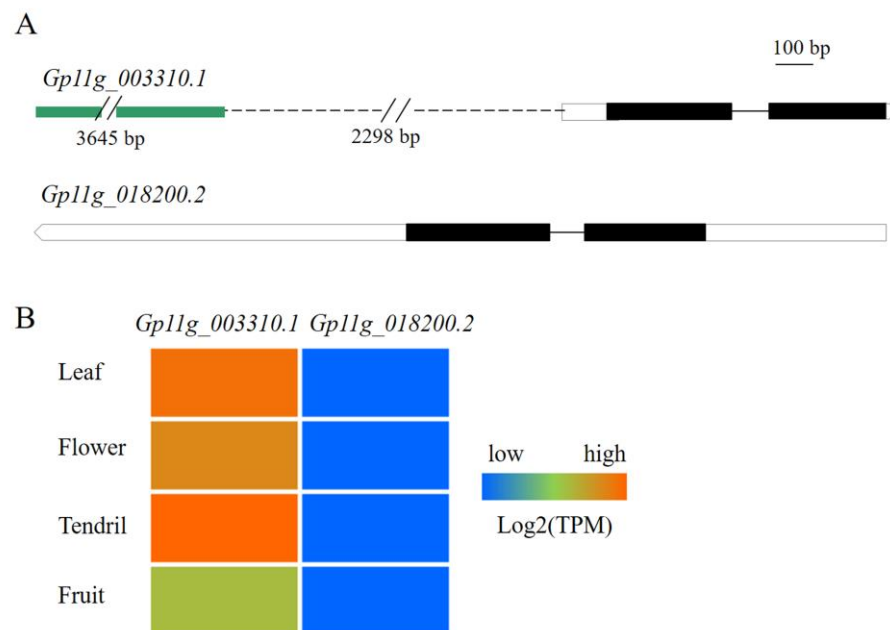

**Figure S3.** Example of gene with promoter LTR-RT insertion showed elevated expression level than its paralog. **(A)** Gene structure of a paralogous gene pair with or without LTR-RT insertion; **(B)** Expression level of this paralogous gene pair.
